# Supplementary material
Source: PubMed Central journal article supplement (PMC5218812)
Supplement: NIHMS765008-supplement-Supplement.pdf [file NIHMS765008-supplement-Supplement.pdf]

**Table 1. Characteristics of 816 Participants in a Healthcare Personnel Cohort with Vaccination Records through Four Prior Years**

| <b><u>Categorical descriptors, N (%)</u></b>      | <b><u>Sample</u><sup>a</sup></b> |
|---------------------------------------------------|----------------------------------|
| Study site (Oregon)                               | 361 ( 44 )                       |
| Sex (Female)                                      | 700 ( 86 )                       |
| Race (White)                                      | 650 ( 80 )                       |
| Ethnicity (Hispanic)                              | 85 ( 10 )                        |
| Child (age <13) at home                           | 248 ( 30 )                       |
| Physician                                         | 52 ( 6 )                         |
| Work in Hospital                                  | 440 ( 54 )                       |
| Work in Emergency Dept.                           | 155 ( 19 )                       |
| Chronic medical condition <sup>b</sup>            | 151 ( 19 )                       |
| <b><u>Continuous descriptors, Median (SD)</u></b> |                                  |
| Age (years)                                       | 48 ( 12 )                        |
| Household size (0-7)                              | 2 ( 2 )                          |
| Education (5-levels)                              | 16 ( 2 )                         |
| Self-rated health status (5-levels)               | 4 ( 1 )                          |
| Body mass index (kg/m <sup>2</sup> )              | 28 ( 28 )                        |
| Direct patient care per week (hours)              | 34 ( 1 )                         |
| <b><u>Prior vaccinations, N (%)</u></b>           |                                  |
| 2006-07 IIV3                                      | 433 ( 53 )                       |
| 2007-08 IIV3                                      | 391 ( 48 )                       |
| 2008-09 IIV3                                      | 464 ( 57 )                       |
| 2009-10 IIV3                                      | 589 ( 72 )                       |
| 2009 MIV A(H1N1)pdm09                             | 401 ( 49 )                       |
| 2010-11 IIV3                                      | 607 ( 74 )                       |
| Sum of Prior IIV3, Mean (SD)                      | 3 ( 1 )                          |

---

\* p < .05; \*\* p < .01; \*\*\* p < .001

<sup>a</sup> Sample (N = 816) includes health care personnel with medical and vaccination records since July, 2006 and excludes those who received live attenuated influenza vaccine (LAIV) in 2010-11 and/or in any season since 2006-07.

<sup>b</sup> Presence of a chronic medical condition was identified by a medical visit during the prior year in the electronic medical record for a medical condition associated with increased risk of influenza complications (codes available from the authors).

**Table 2. Serum Hemagglutination Inhibition Antibody (HI) Titers for A/Perth/16/2009 (H3N2) at Preseason, Post-Vaccination, and Post-Season by Number of Inactivated Influenza Vaccinations (IIV3s) during the Prior Four Seasons, including Estimated Geometric Mean Titer (GMT), Elevated Titers of  $\geq 40$  and  $>100$ , and Geometric Mean Fold Change Ratios (GMRs), among Healthcare Personnel Vaccinated and Unvaccinated with 2010-11 IIV3**

| Subgroup            | Sum of IIV3        |   | Preseason (Time 1) |                          |                       | Post-Vaccination (Time 2) |                    |                          |                       | Post-Season (Time 3) |                   |                          |                       |
|---------------------|--------------------|---|--------------------|--------------------------|-----------------------|---------------------------|--------------------|--------------------------|-----------------------|----------------------|-------------------|--------------------------|-----------------------|
|                     | 2006-07 to 2009-10 | N | GMT (95% CI)       | GMT $\geq 40$ % (95% CI) | GMT $>100$ % (95% CI) | GMT (95% CI)              | GMR (95% CI)       | GMT $\geq 40$ % (95% CI) | GMT $>100$ % (95% CI) | GMT (95% CI)         | GMR (95% CI)      | GMT $\geq 40$ % (95% CI) | GMT $>100$ % (95% CI) |
| <u>2010-11</u>      |                    |   |                    |                          |                       |                           |                    |                          |                       |                      |                   |                          |                       |
| <u>Vaccinated</u>   |                    |   |                    |                          |                       |                           |                    |                          |                       |                      |                   |                          |                       |
| 4 IIV3s             | 227                |   | 10 ( 9 - 11 )      | 14 ( 9 - 18 )            | 3 ( 1 - 10 )          | 23 ( 20 - 27 )            | 2.3 ( 2.1 - 2.6 )  | 46 ( 40 - 51 )           | 11 ( 6 - 15 )         | 14 ( 12 - 16 )       | 0.6 ( 0.6 - 0.7 ) | 23 ( 17 - 29 )           | 5 ( 2 - 8 )           |
| 3 IIV3s             | 153                |   | 12 ( 11 - 14 )     | 19 ( 13 - 25 )           | 2 ( 0 - 13 )          | 32 ( 28 - 38 )            | 2.6 ( 2.3 - 3.0 )  | 55 ( 48 - 61 )           | 8 ( 3 - 13 )          | 17 ( 15 - 20 )       | 0.5 ( 0.5 - 0.6 ) | 32 ( 25 - 39 )           | 2 ( 0 - 6 )           |
| 2 IIV3s             | 85                 |   | 10 ( 8 - 12 )      | 17 ( 9 - 25 )            | 3 ( 0 - 7 )           | 33 ( 25 - 44 )            | 3.4 ( 2.8 - 4.3 )  | 56 ( 47 - 65 )           | 20 ( 13 - 26 )        | 16 ( 13 - 21 )       | 0.5 ( 0.4 - 0.6 ) | 34 ( 24 - 43 )           | 11 ( 5 - 16 )         |
| 1 IIV3s             | 86                 |   | 13 ( 10 - 17 )     | 26 ( 18 - 33 )           | 9 ( 1 - 4 )           | 57 ( 42 - 76 )            | 4.3 ( 3.3 - 5.5 )  | 63 ( 54 - 72 )           | 32 ( 26 - 39 )        | 26 ( 20 - 32 )       | 0.5 ( 0.4 - 0.6 ) | 40 ( 31 - 50 )           | 19 ( 14 - 24 )        |
| 0 IIV3s             | 27                 |   | 8 ( 6 - 11 )       | 12 ( 0 - 25 )            | 4 ( 0 - 6 )           | 50 ( 29 - 88 )            | 6.2 ( 3.4 - 11.3 ) | 69 ( 54 - 85 )           | 37 ( 26 - 48 )        | 15 ( 11 - 23 )       | 0.4 ( 0.2 - 0.5 ) | 25 ( 9 - 41 )            | 4 ( 0 - 14 )          |
| <u>2010-11</u>      |                    |   |                    |                          |                       |                           |                    |                          |                       |                      |                   |                          |                       |
| <u>Unvaccinated</u> |                    |   |                    |                          |                       |                           |                    |                          |                       |                      |                   |                          |                       |
| 4 IIV3s             | 7                  |   | 15 ( 8 - 28 )      | 26 ( 3 - 50 )            | 1 ( 0 - 15 )          |                           |                    |                          |                       | 16 ( 8 - 32 )        | 0.9 ( 0.9 - 0.9 ) | 15 ( 11 - 42 )           | 1 ( 0 - 15 )          |
| 3 IIV3s             | 15                 |   | 12 ( 8 - 19 )      | 13 ( 0 - 29 )            | 7 ( 0 - 16 )          |                           |                    |                          |                       | 15 ( 10 - 25 )       | 0.8 ( 0.9 - 1.9 ) | 18 ( 1 - 36 )            | 1 ( 0 - 8 )           |
| 2 IIV3s             | 33                 |   | 12 ( 9 - 16 )      | 18 ( 7 - 29 )            | 6 ( 0 - 12 )          |                           |                    |                          |                       | 13 ( 10 - 19 )       | 0.9 ( 0.9 - 1.3 ) | 25 ( 13 - 37 )           | 3 ( 0 - 9 )           |
| 1 IIV3s             | 44                 |   | 11 ( 8 - 14 )      | 18 ( 8 - 27 )            | 7 ( 0 - 12 )          |                           |                    |                          |                       | 10 ( 8 - 14 )        | 1.1 ( 0.9 - 1.4 ) | 14 ( 3 - 25 )            | 7 ( 1 - 12 )          |
| 0 IIV3s             | 110                |   | 7 ( 6 - 7 )        | 7 ( 1 - 13 )             | 1 ( 0 - 6 )           |                           |                    |                          |                       | 8 ( 7 - 9 )          | 1.2 ( 1.6 - 1.3 ) | 11 ( 5 - 18 )            | 3 ( 0 - 7 )           |

Note: All estimates adjusted for sex, race (White), age (years) and age-squared, study site, work in a hospital setting or not, household size, and education (years). Among vaccinees, GMR at time 2 describes change in GMT post-vaccination (or since Time 1); at Time 3, GMR describes change in GMT from post-vaccination to the end of season. Among unvaccinated HCP, GMR at Time 3 describes change in GMT since preseason (Time 1). GMRs were calculated using the log-transformed HI titers. GMTs were converted back to original GMT values. The GMR estimate was calculated by 2 to the power of mean difference estimate. The percentage with elevated tiers was estimated using generalized linear models with the same adjusted covariates. In addition, among vaccinees, estimates of post-vaccination elevated titers adjusted for preseason or baseline titers.

**Supplemental Table A. Vaccine components for seasonal inactivated trivalent influenza vaccines (IIV3)**

---

| <b><u>Seasonal Vaccines</u></b> | <b><u>Influenza vaccine components</u></b>                                                                                          |
|---------------------------------|-------------------------------------------------------------------------------------------------------------------------------------|
| 2010-11 IIV3                    | A/California/7/2009 (H1N1)-like virus<br>A/Perth/16/2009 (H3N2)-like virus<br>B/Brisbane/60/2008-like virus (B/Victoria)            |
| 2009-10 IIV3                    | A/Brisbane/59/2007 (H1N1)-like virus<br>A/Brisbane/10/2007 (H3N2)-like virus<br>B/Brisbane/60/2008-like virus (B/Victoria)          |
| 2008-09 IIV3                    | A/Brisbane/59/2007 (H1N1)-like virus<br>A/Brisbane/10/2007 (H3N2)-like virus<br>B/Florida/4/2006-like virus (B/Yamagata)            |
| 2007-08 IIV3                    | A/Solomon Islands/3/2006 (H1N1)-like virus<br>A/Wisconsin/67/2005 (H3N2)-like virus<br>B/Malaysia/2506/2004-like virus (B/Victoria) |
| 2006-07 IIV3                    | A/New Caledonia/20/99 (H1N1)-like virus<br>A/Wisconsin/67/2005 (H3N2)-like virus<br>B/Malaysia/2506/2004-like virus (B/Victoria)    |

**Supplemental Table B. Characteristics of 816 Participants and the Spearman Correlations Between These Factors and the Total Number of Inactivated Trivalent Influenza Vaccinations (IIV3s) during the Prior 4 Seasons, Receipt of the 2010-11 IIV3, Preseason Geometric Mean Titer (GMT) for A/Perth/16/2009 (H3N2), and Post-Vaccination Fold-Change in Titers**

|                                                   | Sample <sup>a</sup> | Number of<br>Prior<br>Vaccinations | Received<br>2010-11 IIV3 | Preseason<br>A(H3N2)<br>GMT | Post-<br>Vaccination<br>Fold Change <sup>b</sup> |
|---------------------------------------------------|---------------------|------------------------------------|--------------------------|-----------------------------|--------------------------------------------------|
| <b><u>Categorical descriptors, N (%)</u></b>      |                     |                                    |                          |                             |                                                  |
| Study site (Oregon)                               | 361 ( 44 )          | .14 ***                            | -.05                     | .05                         | -.17 ***                                         |
| Sex (Female)                                      | 700 ( 86 )          | .06                                | .00                      | .00                         | .05                                              |
| Race (White)                                      | 650 ( 80 )          | .08 **                             | .05                      | .08 *                       | -.07                                             |
| Ethnicity (Hispanic)                              | 85 ( 10 )           | -.05                               | -.01                     | .01                         | .02                                              |
| Child (age <13) at home                           | 248 ( 30 )          | -.08 **                            | -.10 *                   | .03                         | -.02                                             |
| Physician                                         | 52 ( 6 )            | .01                                | .07 *                    | -.05                        | -.07                                             |
| Work in Hospital                                  | 440 ( 54 )          | -.11 ***                           | .03                      | .00                         | .10 *                                            |
| Work in Emergency Dept.                           | 155 ( 19 )          | -.09 **                            | -.08 *                   | .00                         | .01                                              |
| Chronic medical condition <sup>c</sup>            | 151 ( 19 )          | .04                                | .05                      | -.02                        | .03                                              |
| <b><u>Continuous descriptors, Median (SD)</u></b> |                     |                                    |                          |                             |                                                  |
| Age (years)                                       | 48 ( 12 )           | .20 ***                            | .12 **                   | -.05                        | -.02                                             |
| Household size (0-7)                              | 2 ( 2 )             | -.11 *                             | -.09 **                  | -.03                        | .08 *                                            |
| Education (5-levels)                              | 16 ( 2 )            | .10 ***                            | .06                      | -.09 *                      | -.09 *                                           |
| Self-rated health status (5-levels)               | 4 ( 1 )             | .02                                | .01                      | -.05                        | -.02                                             |
| Body mass index (kg/m <sup>2</sup> )              | 28 ( 28 )           | .08 *                              | .07 *                    | .01                         | .07                                              |
| Direct patient care per week (hours)              | 34 ( 1 )            | -.09 **                            | -.03                     | .03                         | .02                                              |
| <b><u>Prior vaccinations, N (%)</u></b>           |                     |                                    |                          |                             |                                                  |
| 2006-07 IIV3                                      | 433 ( 53 )          | .78 ***                            | .40 ***                  | .05                         | -.18 ***                                         |
| 2007-08 IIV3                                      | 391 ( 48 )          | .80 ***                            | .38 ***                  | .08 *                       | -.21 ***                                         |
| 2008-09 IIV3                                      | 464 ( 57 )          | .78 ***                            | .41 ***                  | .08 *                       | -.11 **                                          |
| 2009-10 IIV3                                      | 589 ( 72 )          | .66 ***                            | .54 ***                  | .20 ***                     | -.03                                             |

|                              |            |         |         |         |           |
|------------------------------|------------|---------|---------|---------|-----------|
| 2009 MIV A(H1N1)pdm09        | 401 ( 49 ) | .43 *** | .40 *** | .08 *   | - .14 *** |
| 2010-11 IIV3                 | 607 ( 74 ) | .55 *** | --      | .12 *** | --        |
| Sum of Prior IIV3, Mean (SD) | 3 ( 1 )    | --      | .55 *** | .12 *** | - .20 *** |

---

\* p < .05; \*\* p < .01; \*\*\* p < .001

<sup>a</sup> Sample (N = 816) includes health care personnel with medical and vaccination records since July, 2006 and excludes those who received live attenuated influenza vaccine (LAIV) in 2010-11 and/or in any season since 2006-07.

<sup>b</sup> The post-vaccination sample consists of 578 of 607 vaccinees with sera collected at both pre-season and post-vaccination.

<sup>c</sup> Presence of a chronic medical condition was identified by a medical visit during the prior year in the electronic medical record for a medical condition associated with increased risk of influenza complications (codes available from the authors).

**Supplemental Table C. Serum Hemagglutination Inhibition Antibody (HI) Titers for A/Perth/16/2009 (H3N2) at Preseason, including Estimated Geometric Mean Titer (GMT) and Elevated Titer  $\geq 40$  and  $>100$ , by Prior Vaccination History, among Healthcare Personnel in Fall, 2010**

|                                    | <b>N</b> | <b>Preseason (Time 1)</b> |                                                |                                                |
|------------------------------------|----------|---------------------------|------------------------------------------------|------------------------------------------------|
|                                    |          | <b>GMT<br/>(95% CI)</b>   | <b>GMT <math>\geq 40</math><br/>% (95% CI)</b> | <b>GMT <math>&gt;100</math><br/>% (95% CI)</b> |
| <b><u>Sum of seasonal IIV3</u></b> |          |                           |                                                |                                                |
| <b><u>2006-07 to 2009-10</u></b>   |          |                           |                                                |                                                |
| 4 IIV3s                            | 243      | 10 ( 9 - 11 )             | 14 ( 9 - 17 )                                  | 4 ( 1 - 5 )                                    |
| 3 IIV3s                            | 176      | 12 ( 10 - 14 )            | 19 ( 13 - 24 )                                 | 2 ( 0 - 5 )                                    |
| 2 IIV3s                            | 124      | 11 ( 9 - 13 )             | 18 ( 11 - 24 )                                 | 4 ( 1 - 7 )                                    |
| 1 IIV3s                            | 135      | 12 ( 11 - 15 )            | 23 ( 17 - 29 )                                 | 8 ( 5 - 11 )                                   |
| 0 IIV3s                            | 141      | 7 ( 6 - 8 )               | 8 ( 2 - 14 )                                   | 2 ( 0 - 5 )                                    |

Note: All estimates adjusted for sex, race (White), age (years) and age squared (quadratic term), study site, work in a hospital setting or not, household size, and education (years)

**Supplemental Table D. Serum Hemagglutination Inhibition Antibody (HI) Titers at Preseason, Post-Vaccination, and End-of-Season for A/Perth/16/2009 (H3N2) by Influenza Vaccination History, including Estimated Geometric Mean Titer (GMT), Elevated Titer  $\geq 40$ , and Geometric Mean Fold Change Ratios (GMRs), among Healthcare Personnel Vaccinated and Unvaccinated with 2010-11 Inactivated Influenza Trivalent Vaccine (IIV3) Stratified by Age Group**

| Subgroup                | Vaccination History                            | N  | Preseason (Time 1) |                          | Post-Vaccination (Time 2) |                    |                          |
|-------------------------|------------------------------------------------|----|--------------------|--------------------------|---------------------------|--------------------|--------------------------|
|                         |                                                |    | GMT (95% CI)       | GMT $\geq 40$ % (95% CI) | GMT (95% CI)              | GMR (95% CI)       | GMT $\geq 40$ % (95% CI) |
| <u>2010-11</u>          |                                                |    |                    |                          |                           |                    |                          |
| <u>Vaccinated</u>       |                                                |    |                    |                          |                           |                    |                          |
| Aged 18-34 <sup>a</sup> | Mixed                                          |    | 12 ( 10 - 15 )     | 22 ( 16 - 27 )           | 42 ( 33 - 55 )            | 3.4 ( 2.8 - 4.2 )  | 62 ( 53 - 71 )           |
| Aged 35-49 <sup>a</sup> | Mixed                                          |    | 10 ( 9 - 11 )      | 14 ( 9 - 18 )            | 25 ( 22 - 30 )            | 2.5 ( 2.2 - 2.9 )  | 44 ( 37 - 51 )           |
| Aged 50-64 <sup>a</sup> | Mixed                                          |    | 11 ( 10 - 12 )     | 15 ( 11 - 19 )           | 33 ( 28 - 38 )            | 3.0 ( 2.7 - 3.4 )  | 55 ( 50 - 61 )           |
| <u>2010-11</u>          |                                                |    |                    |                          |                           |                    |                          |
| <u>Vaccinated</u>       |                                                |    |                    |                          |                           |                    |                          |
|                         | <u>Sum of seasonal IIV3 2006-07 to 2009-10</u> |    |                    |                          |                           |                    |                          |
| Aged 18-34 <sup>b</sup> |                                                |    |                    |                          |                           |                    |                          |
|                         | 4 IIV3s                                        | 22 | 10 ( 7 - 16 )      | 15 ( 0 - 30 )            | 27 ( 17 - 43 )            | 2.7 ( 1.9 - 3.7 )  | 58 ( 38 - 77 )           |
|                         | 3 IIV3s                                        | 32 | 11 ( 8 - 14 )      | 15 ( 2 - 28 )            | 26 ( 17 - 40 )            | 2.4 ( 1.8 - 3.3 )  | 52 ( 36 - 68 )           |
|                         | 2 IIV3s                                        | 19 | 14 ( 8 - 23 )      | 24 ( 7 - 41 )            | 56 ( 33 - 94 )            | 4.0 ( 2.3 - 6.9 )  | 69 ( 48 - 90 )           |
|                         | 1 IIV3s                                        | 23 | 18 ( 10 - 32 )     | 34 ( 19 - 49 )           | 82 ( 42 - 162 )           | 4.5 ( 2.7 - 7.5 )  | 73 ( 54 - 93 )           |
|                         | 0 IIV3s                                        | 11 | 10 ( 5 - 20 )      | 25 ( 1 - 48 )            | 66 ( 21 - 206 )           | 6.6 ( 2.5 - 17.9 ) | 81 ( 53 - 100 )          |
| Aged 35-49 <sup>b</sup> |                                                |    |                    |                          |                           |                    |                          |
|                         | 4 IIV3s                                        | 73 | 10 ( 8 - 13 )      | 14 ( 6 - 22 )            | 22 ( 17 - 29 )            | 2.2 ( 1.8 - 2.7 )  | 40 ( 28 - 51 )           |
|                         | 3 IIV3s                                        | 49 | 13 ( 10 - 17 )     | 21 ( 11 - 31 )           | 25 ( 19 - 34 )            | 2.0 ( 1.6 - 2.4 )  | 48 ( 34 - 61 )           |
|                         | 2 IIV3s                                        | 31 | 8 ( 6 - 11 )       | 11 ( 0 - 23 )            | 27 ( 17 - 43 )            | 3.4 ( 2.4 - 4.9 )  | 43 ( 26 - 60 )           |
|                         | 1 IIV3s                                        | 30 | 10 ( 7 - 13 )      | 16 ( 3 - 29 )            | 34 ( 24 - 49 )            | 3.5 ( 2.3 - 5.2 )  | 55 ( 38 - 73 )           |
|                         | 0 IIV3s                                        | 8  | 5 ( 4 - 7 )        | 0 ( 0 - 22 )             | 20 ( 5 - 84 )             | 3.7 ( 0.8 - 16.0 ) | 31 ( 0 - 63 )            |
| Aged 50-64 <sup>b</sup> |                                                |    |                    |                          |                           |                    |                          |

|         |     |                |                |                 |                    |                |
|---------|-----|----------------|----------------|-----------------|--------------------|----------------|
| 4 IIV3s | 132 | 10 ( 8 - 11 )  | 12 ( 6 - 19 )  | 23 ( 19 - 28 )  | 2.2 ( 1.8 - 2.7 )  | 42 ( 34 - 50 ) |
| 3 IIV3s | 72  | 13 ( 10 - 16 ) | 20 ( 12 - 29 ) | 41 ( 32 - 54 )  | 2.0 ( 1.6 - 2.4 )  | 67 ( 56 - 79 ) |
| 2 IIV3s | 35  | 10 ( 7 - 13 )  | 20 ( 7 - 32 )  | 30 ( 19 - 49 )  | 3.2 ( 2.2 - 4.7 )  | 54 ( 38 - 70 ) |
| 1 IIV3s | 33  | 14 ( 9 - 22 )  | 27 ( 14 - 39 ) | 69 ( 40 - 118 ) | 4.9 ( 3.1 - 7.9 )  | 76 ( 60 - 92 ) |
| 0 IIV3s | 8   | 9 ( 3 - 31 )   | 9 ( 0 - 31 )   | 87 ( 27 - 287 ) | 9.5 ( 1.9 - 46.9 ) | 67 ( 36 - 98 ) |

Note: Given the small number of participants in the stratified models, only age (years) and study site were included in the multivariable models; models including all covariates offered similar result. The models were calculated using the log-transformed HI titers. GMTs were converted back to original GMT values. The GMR estimate was calculated by 2 to the power of mean difference estimate. GMT >100 was not calculated given the small number of participants with highly elevated titers stratified by age.

<sup>a</sup> A statistically significant interaction between age and GMR was noted ( $F[2, 569] = 3.41, p = .03, \text{partial } \eta^2 = .01$ ). Statistically significant parameters for age and age-squared were also noted in the models ( $p$ 's < .0005). Taken together, this prompted secondary analyses to examine results stratified by age group. Each row includes HCP within that age group and includes a mixture of prior vaccination exposures in that strata. Due to the reduced number of participants in each strata, we did not estimate the percentage with titers >100.

<sup>b</sup> Statistically significant interactions between number of prior vaccinations and GMR were noted for HCP aged 18-34 years ( $F[4,100] = 2.88, p = .026, \text{partial } \eta^2 = .10$ ), HCP aged 35-49 years ( $F[4,184] = 2.47, p = .03, \text{partial } \eta^2 = .06$ ), and HCP aged 50-64 years ( $F[4,273] = 6.13, p < .0005, \text{partial } \eta^2 = .08$ ).



**Supplemental Table E. Serum Hemagglutination Inhibition Antibody (HI) Titers for A/Perth/16/2009 (H3N2) Post-Vaccination by Number of Inactivated Influenza Vaccinations (IIV3s) during the Prior Four Seasons, among 404 Participants with Preseason GMT of <40, including Geometric Mean Fold Change Ratios (GMRs) and the Percentage who Achieved Elevated Titers of  $\geq 40$  and  $>100$**

| Sum of IIV3<br>2006-07 to<br>2009-10 | N   | Post-Vaccination (Time) |                             |                          |
|--------------------------------------|-----|-------------------------|-----------------------------|--------------------------|
|                                      |     | GMR<br>(95% CI)         | GMT $\geq 40$<br>% (95% CI) | GMT $>100$<br>% (95% CI) |
| 4 IIV3s                              | 200 | 2.5 ( 2.2 - 2.8 )       | 37 ( 30 - 43 )              | 5 ( 1 - 9 )              |
| 3 IIV3s                              | 125 | 2.9 ( 2.5 - 3.4 )       | 43 ( 35 - 51 )              | 4 ( 0 - 9 )              |
| 2 IIV3s                              | 73  | 3.8 ( 2.9 - 4.8 )       | 47 ( 37 - 57 )              | 12 ( 5 - 18 )            |
| 1 IIV3s                              | 6   | 4.9 ( 3.6 - 6.7 )       | 57 ( 47 - 68 )              | 22 ( 15 - 29 )           |

Note: These results exclude participants with preseason GMT of  $\geq 40$ . Due to the reduced sample in this stratified analysis, participants with zero prior vaccinations were excluded. All estimates adjusted for sex, race (White), age (years) and age-squared, study site, work in a hospital setting or not, household size, and education (years). Post-vaccination GMR describes change in GMT from preseason to post-vaccination. GMRs were calculated using the log-transformed HI titers. GMTs were converted back to original GMT values. The GMR estimate was calculated by 2 to the power of mean difference estimate. The percentages of HCP with elevated tiers were estimated using generalized linear models with the same adjusted covariates. In addition, post-vaccinated elevated titers adjust for preseason or baseline titers.
